# Supplementary material for: Plasmonic Bi NP-accelerated interfacial charge transfer for enhanced solar-driven ciprofloxacin mineralization
Source: Royal Society of Chemistry journal article supplement (doi:10.1039/d1en00896j), 2021-12-02
Supplement: d1en00896j1.pdf [file d1en00896j1.pdf]

## Supplementary Information

### **Plasmonic Bi NPs-accelerated interfacial charge transfer for enhanced solar-driven ciprofloxacin mineralization**

Cailiang Yue <sup>a</sup>; Changqing Zhu <sup>a</sup>; Wenting Zheng <sup>a</sup>; Jinli Qiu <sup>a</sup>; Zhiling Du <sup>a</sup>; Chen Ling<sup>b</sup>; Fu-Qiang Liu <sup>a, \*</sup>;

<sup>a</sup> *State Key Laboratory of Pollution Control and Resource Reuse, School of the Environment, Nanjing University, Nanjing 210023, Jiangsu, P.R. China*

<sup>b</sup> *College of Biology and the Environment, Nanjing Forestry University, Nanjing 210037, Jiangsu, P.R. China*

**\* Corresponding Author**

*\*Phone: +86 139 1387 1032; E-mail: lfq@nju.edu.cn (Fu-Qiang Liu)*

## **Txt S1. Preparation of photocatalysts**

**Preparation of Bi NPs.** Bi NPs was synthesized via simple solvothermal method. Generally, 4 mmol  $\text{Bi}(\text{NO}_3)_3 \cdot 5\text{H}_2\text{O}$  was dissolved in 40 mL ethylene glycol with slowly stirring for 1 h. Afterwards, the solution was transferred into a 100 mL Teflon-lined stainless-steel autoclave and solvothermally treated at 200 °C for 12 h prior to natural cooling to room temperature. The obtained powder was centrifuged, washed thrice with ultrapure water and dried at 200 °C for 12 h.

**Preparation of  $\text{Bi}_2\text{MoO}_6$  and BiOBr.**  $\text{Bi}_2\text{MoO}_6$  and BiOBr were synthesized by solvothermal method. Firstly, 4 mmol  $\text{Bi}(\text{NO}_3)_3 \cdot 5\text{H}_2\text{O}$  was dissolved in 40 mL ethylene glycol to obtain solution A. 4 mmol NaBr and 2 mmol  $\text{Na}_2\text{MoO}_4$  were dissolved in 10 mL ethylene glycol to obtain solution B. Subsequently, solution B was dropped into solution A with slowly stirring for 1 h. Then, the mixed solution was transferred into a 100 mL Teflon-lined stainless-steel autoclave and solvothermally treated at 140 °C for 12 h prior to natural cooling to room temperature. The obtained powder was centrifuged, washed three times with ultrapure water and dried at 60 °C for 12 h. The obtained  $\text{Bi}_2\text{MoO}_6$  and BiOBr were named as BMO and BOB, respectively.

**Preparation of Bi/ $\text{Bi}_2\text{MoO}_6$  and Bi/BiOBr.** The synthesis of Bi/ $\text{Bi}_2\text{MoO}_6$  and Bi/BiOBr were similar to that of BMO and BOB, except that the solvothermal temperature was adjusted to 200 °C.

**Preparation of  $\text{Bi}_2\text{MoO}_6/\text{BiOBr}$ .** For comparison, binary heterojunction  $\text{Bi}_2\text{MoO}_6/\text{BiOBr}$  with optimized molar ratio ( $\text{NaBr}:\text{Na}_2\text{MoO}_4=2:1$ ) was also prepared. Generally, 4 mmol  $\text{Bi}(\text{NO}_3)_3 \cdot 5\text{H}_2\text{O}$ , 2 mmol NaBr and 1 mmol  $\text{Na}_2\text{MoO}_4$  was dissolved in 40 mL ethylene glycol with slowly stirring for 1 h. Then, the solution was transferred into a 100 mL Teflon-lined stainless-steel autoclave and was solvothermally treated at 140 °C for 12 h and followed by natural cooling to room temperature. The obtained powder was centrifuged, washed three times with ultrapure water and dried at 60 °C for 12h. The obtained  $\text{Bi}_2\text{MoO}_6/\text{BiOBr}$  was named as BMO/BOB.

**Table S1.** The synthesis conditions of different photocatalysts.

| <b>Photocatalysts</b> | <b>Temperature<br/>&amp; Time</b> | <b>Bi(NO<sub>3</sub>)<sub>3</sub></b> | <b>NaBr</b> | <b>Na<sub>2</sub>MoO<sub>6</sub></b> |
|-----------------------|-----------------------------------|---------------------------------------|-------------|--------------------------------------|
| <b>Bi</b>             | 200 °C/24 h                       | 4 mmol                                | 0           | 0                                    |
| <b>BMO</b>            | 140 °C/24 h                       | 4 mmol                                | 0           | 2.0 mmol                             |
| <b>BOB</b>            | 140 °C/24 h                       | 4 mmol                                | 4 mmol      | 0                                    |
| <b>Bi/BMO</b>         | 200 °C/24 h                       | 4 mmol                                | 0           | 2.0 mmol                             |
| <b>Bi/BOB</b>         | 200 °C/24 h                       | 4 mmol                                | 4 mmol      | 0                                    |
| <b>BMO/BOB</b>        | 140 °C/24 h                       | 4 mmol                                | 2 mmol      | 1.0 mmol                             |
| <b>BMO/Bi/BOB-1</b>   | 200 °C/24 h                       | 4 mmol                                | 3 mmol      | 0.5 mmol                             |
| <b>BMO/Bi/BOB-2</b>   | 200 °C/24 h                       | 4 mmol                                | 2 mmol      | 1.0 mmol                             |
| <b>BMO/Bi/BOB-3</b>   | 200 °C/24 h                       | 4 mmol                                | 1 mmol      | 1.5 mmol                             |

**Table S2.** Analysis parameters for representative organic pollutants.

|                                             | SMZ                                                                                                                   | TC                                                                                                                     | BPA                                                                          | Phenol                                                                       |
|---------------------------------------------|-----------------------------------------------------------------------------------------------------------------------|------------------------------------------------------------------------------------------------------------------------|------------------------------------------------------------------------------|------------------------------------------------------------------------------|
| <b>Instrument</b>                           | HPLC, LC-2030C, Shimadzu                                                                                              |                                                                                                                        |                                                                              |                                                                              |
| <b>Column</b>                               | C18 column (4.6 $\mu$ m, 2.1 mm $\times$ 250 mm)                                                                      |                                                                                                                        |                                                                              |                                                                              |
| <b>Injection volume (<math>\mu</math>L)</b> | 10                                                                                                                    |                                                                                                                        |                                                                              |                                                                              |
| <b>Flow rate (mL/min)</b>                   | 1                                                                                                                     |                                                                                                                        |                                                                              |                                                                              |
| <b>Mobile phase</b>                         | Mobile phase A:<br>H <sub>2</sub> O (0.5wt% KH <sub>2</sub> PO <sub>4</sub> )<br>Mobile phase B:<br>100% Acetonitrile | Mobile phase A:<br>H <sub>2</sub> O (0.5wt% NaH <sub>2</sub> PO <sub>4</sub> )<br>Mobile phase B:<br>100% Acetonitrile | Mobile phase A:<br>100% Methanol<br>Mobile phase B:<br>100% H <sub>2</sub> O | Mobile phase A:<br>100% Methanol<br>Mobile phase B:<br>100% H <sub>2</sub> O |
| <b>Elution program</b>                      | Gradient:<br>60% Mobile phase A<br>40% Mobile phase B                                                                 | Gradient:<br>75% Mobile phase A<br>25% Mobile phase B                                                                  | Gradient:<br>70% Mobile phase A<br>30% Mobile phase B                        | Gradient:<br>80% Mobile phase A<br>20% Mobile phase B                        |
| <b>Detector</b>                             | UV detector                                                                                                           |                                                                                                                        |                                                                              |                                                                              |
| <b>Wavelength</b>                           | 270 nm                                                                                                                | 358 nm                                                                                                                 | 275 nm                                                                       | 224 nm                                                                       |

**Table S3.** BET surface and porosity parameters of BOB, BMO, BMO/BOB and BMO/Bi/BOB-2.

| Sample       | $S_{\text{BET}}$<br>( $\text{m}^2 \cdot \text{g}^{-1}$ ) | Micropore volume<br>( $\text{cm}^3 \cdot \text{g}^{-1}$ ) | Average pore<br>diameter (nm) |
|--------------|----------------------------------------------------------|-----------------------------------------------------------|-------------------------------|
| BOB          | 7.91                                                     | 0.09                                                      | 30.21                         |
| BMO          | 8.32                                                     | 0.08                                                      | 24.49                         |
| BMO/BOB      | 20.03                                                    | 0.07                                                      | 8.33                          |
| BMO/Bi/BOB-2 | 28.84                                                    | 0.06                                                      | 7.02                          |

**Table S4.** Bi specie content (Atom ratio%) of BMO/Bi/BOB-2.

| Bi 4f            | Area ratio (%) |
|------------------|----------------|
| $\text{Bi}^{3+}$ | 89.25          |
| $\text{Bi}^0$    | 10.75          |

**Table S5.** Comparison of photocatalytic CIP degradation over recently reported photocatalysts.

| Photocatalysts                                                                 | Dosage<br>(g/L) | Concentration<br>(mg/L) | Light source            | k value<br>(min <sup>-1</sup> ) | TOC removal (%)         | Refs.    |
|--------------------------------------------------------------------------------|-----------------|-------------------------|-------------------------|---------------------------------|-------------------------|----------|
| <b>Zn doped Cu<sub>2</sub>O</b>                                                | 0.6             | 20                      | 500 W metal halide lamp | 0.0038                          | -                       | 1        |
| <b>TiO<sub>2</sub>/γ-Fe<sub>2</sub>O<sub>3</sub>/GO</b>                        | 0.4             | 10                      | 300W Xe light           | 0.0048                          | 49.0% in 160 min        | 2        |
| <b>γ-Fe<sub>2</sub>O<sub>3</sub> @ZnO</b>                                      | 0.5             | 10                      | 300W Xe light           | 0.0843                          | -                       | 3        |
| <b>N-doped TiO<sub>2</sub></b>                                                 | 0.5             | 10                      | Blue LED light          | 0.0093                          | -                       | 4        |
| <b>BiOCl/diatomite</b>                                                         | 0.5             | 10                      | 300W Xe light           | -                               | 42.9% in 240 min        | 5        |
| <b>Bi<sub>2</sub>O<sub>3</sub>/(BiO)<sub>2</sub>CO<sub>3</sub></b>             | 0.5             | 10                      | 300W Xe light           | 0.1170                          | 21% in 240 min          | 6        |
| <b>Br doped Bi<sub>2</sub>O<sub>3</sub>CO<sub>3</sub></b>                      | 0.5             | 10                      | 240W Xe light           | 0.0860                          | 43% in 30 min           | 7        |
| <b>Bi/Bi<sub>3</sub>NbO<sub>7</sub></b>                                        | 0.5             | 10                      | 300W Xe light           | 0.0143                          | 53% in 180 min          | 8        |
| <b>rGO/Fe<sub>2</sub>O<sub>3</sub>/g-C<sub>3</sub>N<sub>4</sub></b>            | 1               | 50                      | 500W halogen lamp       | 0.0836                          | -                       | 9        |
| <b>TP-TiO<sub>2</sub></b>                                                      | 0.1             | 10                      | UV-vis light            | 0.0403                          | -                       | 10       |
| <b>P25</b>                                                                     | 0.1             | 20                      | LED                     | 0.2217                          | 62.7% in 40 min         | 11       |
| <b>Mn<sub>2</sub>O<sub>3</sub>/Mn<sub>3</sub>O<sub>4</sub>/MnO<sub>2</sub></b> | 0.2             | 10                      | 300W Xe lamp            | -                               | 78.3% in 40 min         | 12       |
| <b>Ag<sub>2</sub>CrO<sub>4</sub>/Ag/BiFeO<sub>3</sub></b>                      | 0.2             | 10                      | 350W Xe light           | 0.0638                          | 78.3% in 120 min        | 13       |
| <b>@RGO</b>                                                                    |                 |                         |                         |                                 |                         |          |
| <b>This work</b>                                                               | <b>0.4</b>      | <b>20</b>               | <b>350W Xe light</b>    | <b>0.1389</b>                   | <b>79.9% in 120 min</b> | <b>-</b> |

**Table S6.** The recovery rates and Bi leaching on each cycle.

|                           | 1st   | 2nd   | 3rd   | 4th   | 5th   |
|---------------------------|-------|-------|-------|-------|-------|
| <b>Recovery rate (%)</b>  | 100   | 97.61 | 96.17 | 94.62 | 93.07 |
| <b>Bi leaching (mg/L)</b> | 0.093 | 0.089 | 0.076 | 0.070 | 0.072 |

**Table S7.** Fitting parameters for TRPL of prepared photocatalysts.

| Fitting parameters  | $\tau_1(\text{ns})$ | $\tau_2(\text{ns})$ | $B_1$   | $B_2$  | $\tau_{\text{average}}(\text{ns})$ |
|---------------------|---------------------|---------------------|---------|--------|------------------------------------|
| <b>BOB</b>          | 2.58                | 65.52               | 2045.73 | 348.17 | <b>53.69</b>                       |
| <b>BMO</b>          | 2.42                | 55.12               | 2194.34 | 328.64 | <b>43.61</b>                       |
| <b>BMO/BOB</b>      | 2.41                | 115.09              | 2664.32 | 90.73  | <b>72.18</b>                       |
| <b>BMO/Bi/BOB-2</b> | 2.29                | 135.12              | 2754.34 | 78.64  | <b>85.51</b>                       |

Time-resolved fluorescence decay spectra of BMO, BOB, BMO/BOB and BMO/Bi/BOB-2 were determined at 475, 441, 465 and 455 nm respectively under the incident light of 325 nm. The decay curves could be fitted based on the following equation.

$$I = B_1 \exp(-t/\tau_1) + B_2 \exp(-t/\tau_2) \quad \text{Eq. S1}$$

The average lifetime was calculated by using the following equation.

$$\tau_{\text{average}} = (B_1 \tau_1^2 + B_2 \tau_2^2) / (B_1 \tau_1 + B_2 \tau_2) \quad \text{Eq. S2}$$

**Table S8.** The structural information of CIP and the possible intermediates.

| Compounds | Formula               | m/z | Proposed structure                                                                    |
|-----------|-----------------------|-----|---------------------------------------------------------------------------------------|
| CIP       | $C_{17}H_{18}FN_3O_3$ | 332 | 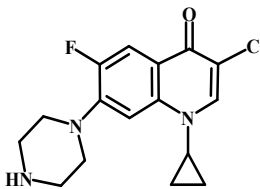   |
| I 1       | $C_{17}H_{16}FN_3O_5$ | 362 | 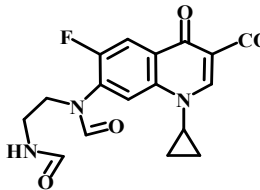   |
| I 2       | $C_{16}H_{16}FN_3O_4$ | 334 | 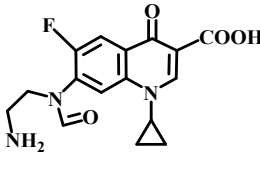  |
| I 2'      | $C_{16}H_{16}FN_3O_4$ | 334 | 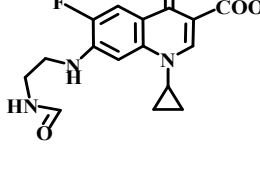 |
| I 3       | $C_{15}H_{16}FN_3O_3$ | 306 | 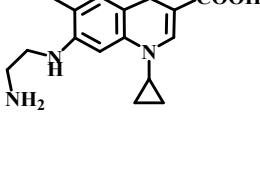 |
| I 4       | $C_{15}H_{15}FN_2O_3$ | 291 | 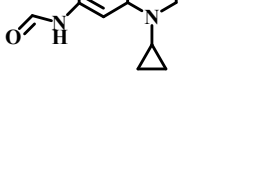 |

I 5

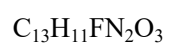

263

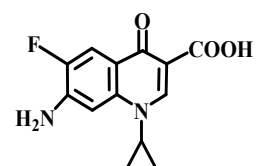

I 6

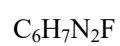

126

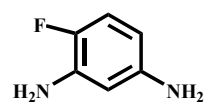

---

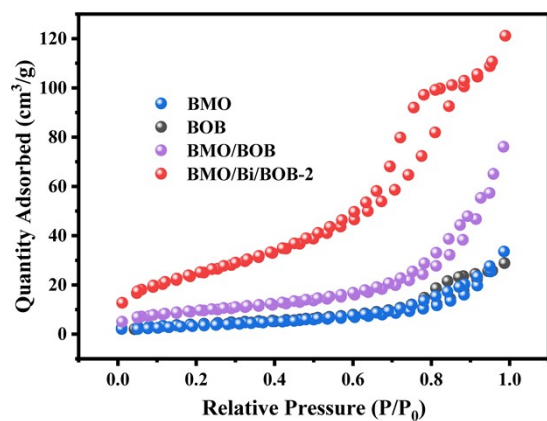

**Figure S1.**  $N_2$  adsorption–desorption isotherms of BMO, BOB, BMO/BOB and BMO/Bi/BOB-2.

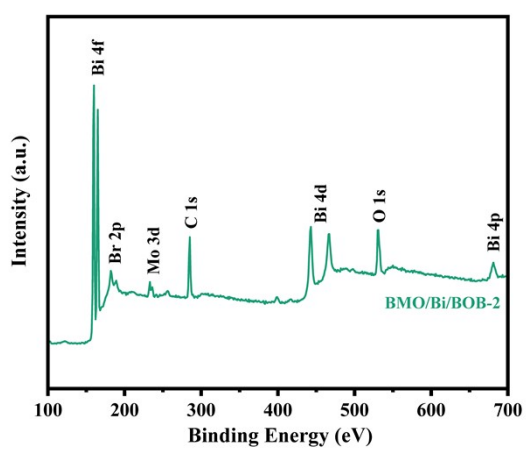

**Figure S2.** Survey XPS spectrum of BMO/Bi/BOB-2.

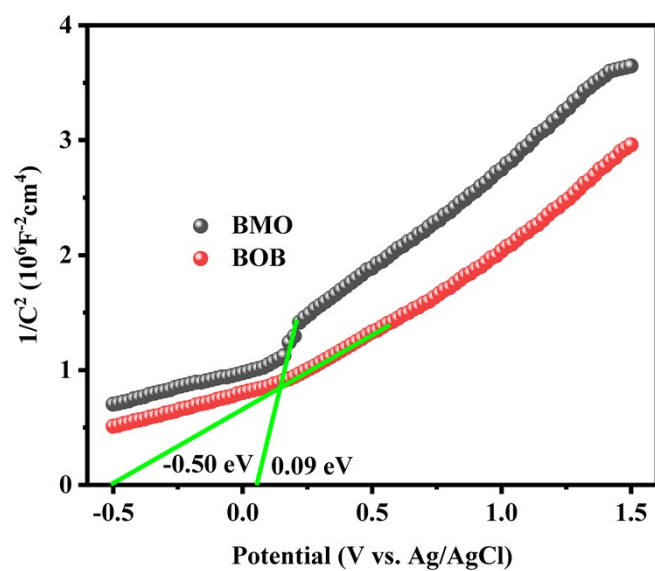

**Figure S3.** Mott-Schottky plots of BMO and BOB.

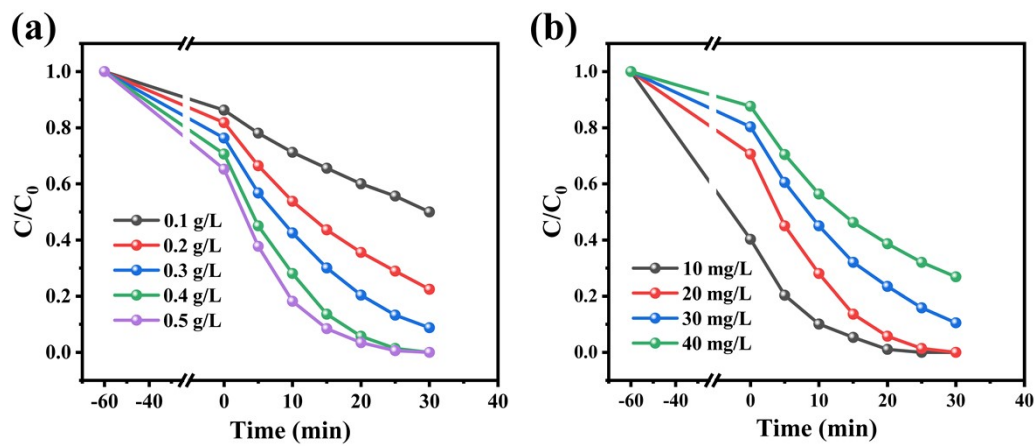

**Figure S4.** (a) Effects of BMO/Bi/BOB-2 dosage on photocatalytic CIP degradation process ([CIP] = 20 mg/L); (b) Effects of CIP concentration on photocatalytic degradation process ([BMO/Bi/BOB-2 dosage] = 0.4 g/L).

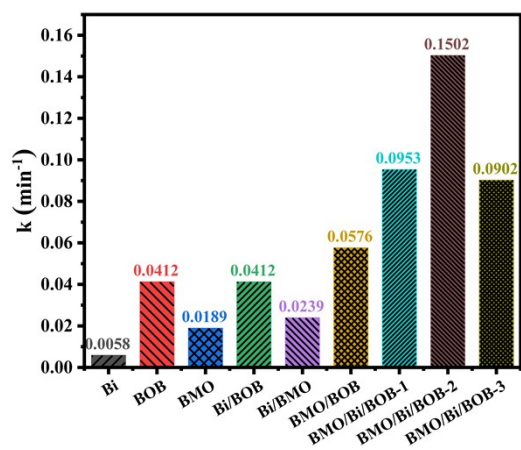

**Figure S5.**  $k$  values of as-prepared photocatalysts for CIP degradation.

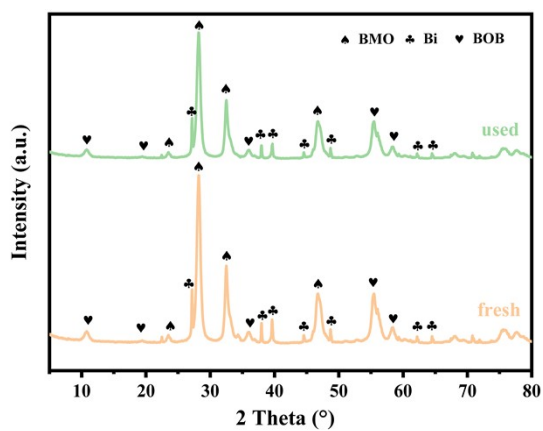

**Figure S6.** XRD patterns of fresh and used BMO/Bi/BOB-2.

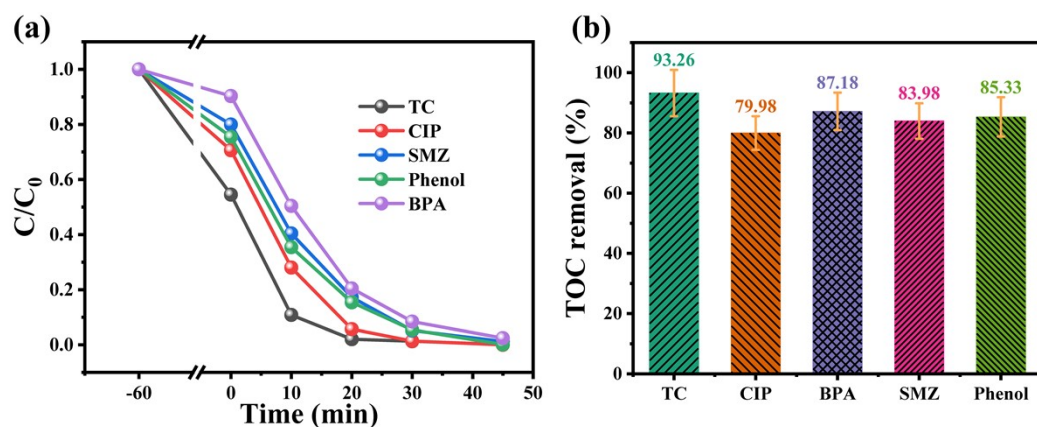

**Figure S7.** (a) The photocatalytic degradation curves and (b) TOC removal ratios of different organic pollutants by BMO/Bi/BOB-2.

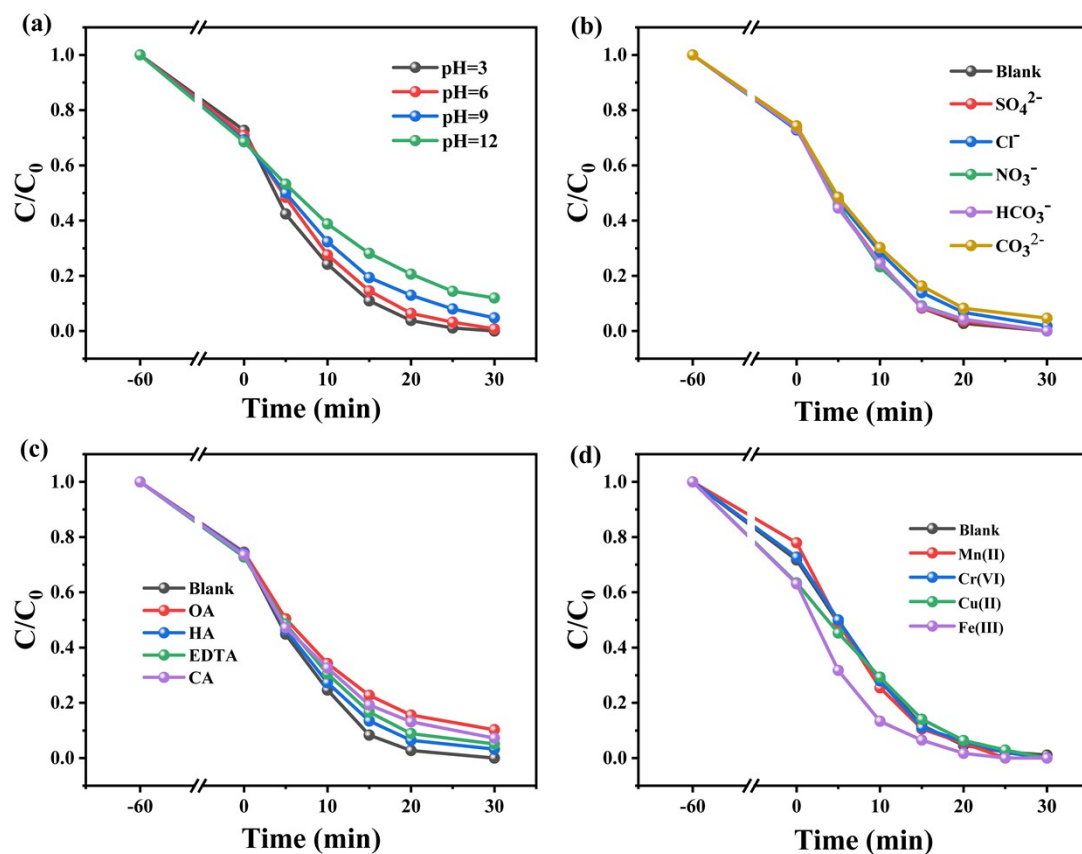

**Figure S8.** The effects of pH values (a), anions (b), organic matters (c), cations (d), on the degradation of CIP over BMO/Bi/BOB-2.

As shown in Fig. S8a, the photocatalytic CIP degradation process was gradually inhibited with the increase of pH value. At the high pH values, both of the CIP and photocatalyst were both negatively charged, leading to electrostatic repulsion between them and the low photocatalytic degradation efficiency of CIP. As shown in Fig. S8b-

d, we investigated the effect on photocatalytic CIP degradation of 5 common environmental coexist anions ( $\text{SO}_4^{2-}$ ,  $\text{Cl}^-$ ,  $\text{NO}_3^-$ ,  $\text{HCO}_3^-$  and  $\text{CO}_3^{2-}$ ), 4 common environmental coexist organic acids (OA, HA, EDTA and CA) and 4 common environmental coexist heavy metals ( $\text{Mn}^{2+}$ ,  $\text{CrO}_4^{2-}$ ,  $\text{Fe}^{3+}$  and  $\text{Cu}^{2+}$ ). Among these environmental factors, 4 ( $\text{Cl}^-$ ,  $\text{NO}_3^-$ ,  $\text{HCO}_3^-$  and  $\text{CO}_3^{2-}$ ) and 4 organic acids (OA, HA, EDTA and CA) exhibited a little negative effect on photocatalytic CIP degradation process, as they could act as trapping agents of  $\cdot\text{OH}$ . It's worth noting that Fe(III) could enhance photocatalytic CIP degradation process as Fe(III) could complex with CIP to form reddish brown photosensitive Fe(III)-CIP complexes.

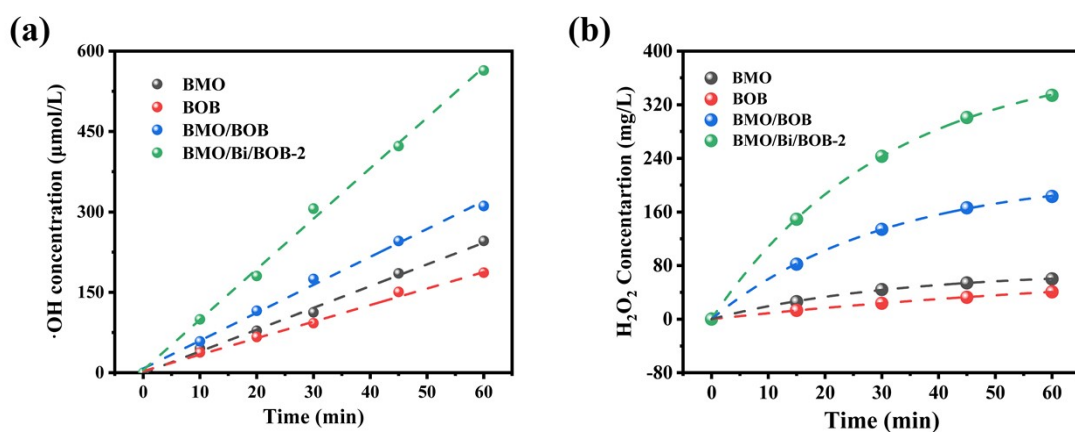

**Figure S9.** Photocatalytic  $\cdot\text{OH}$  production curves (a) and  $\text{H}_2\text{O}_2$  production curves (b) of BMO, BOB, BMO/BOB and BMO/Bi/BOB-2.

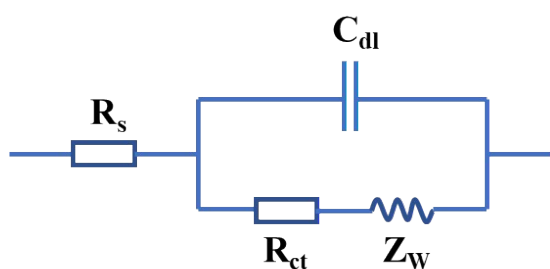

**Figure S10.** The analog equivalent circuit diagram of electrochemical impedance test

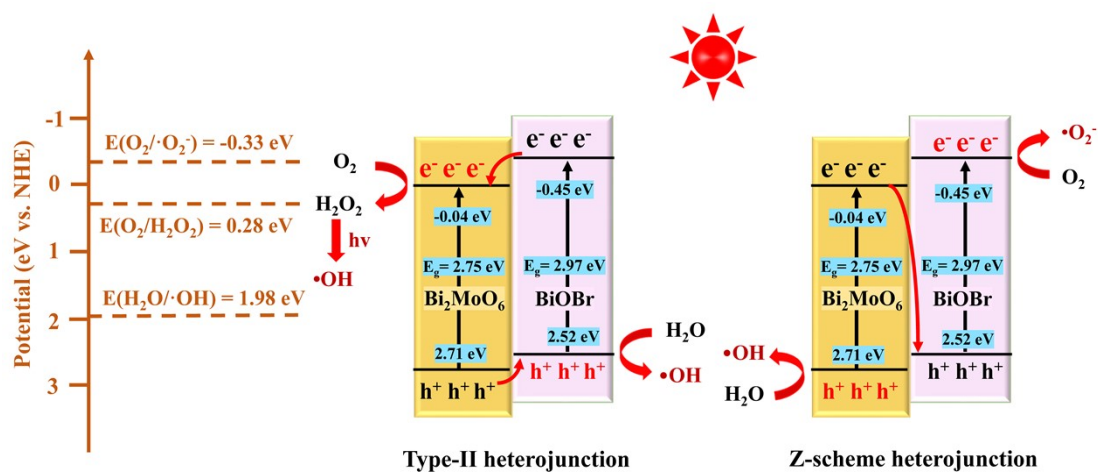

**Figure S11.** Schematic diagrams for type-II and Z-scheme heterojunction.

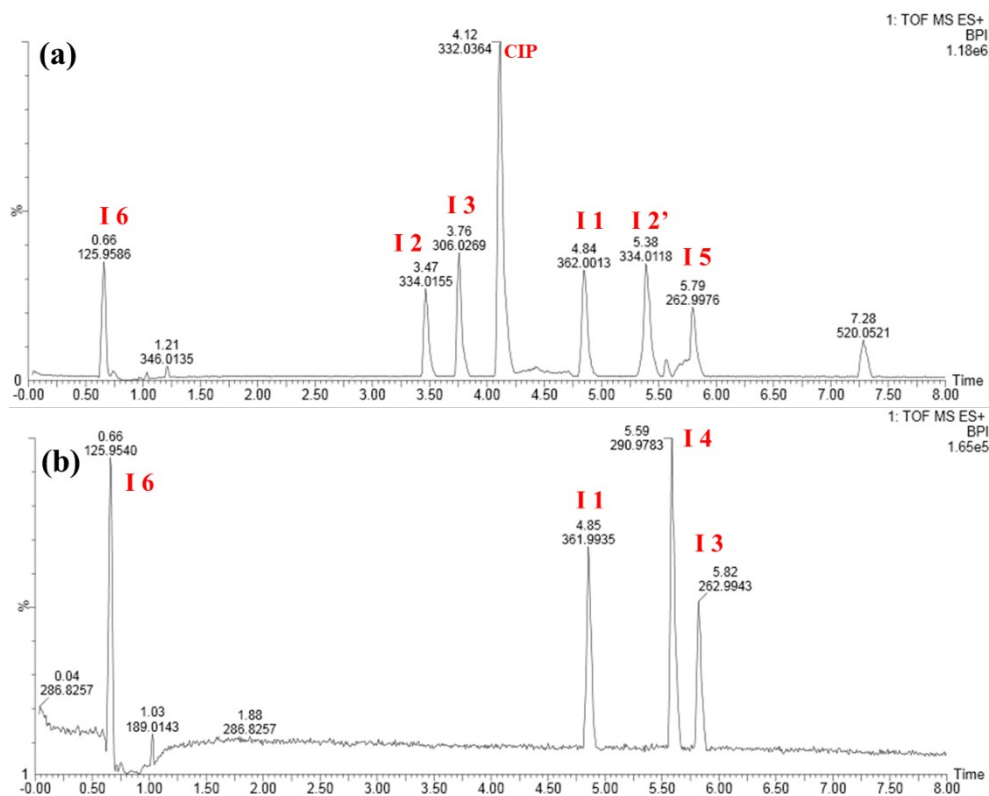

**Figure S12.** LC-MS chromatogram in ES<sup>+</sup> mode for samples withdrawn at (a) 15 min and (b) 30 min irradiation.

## References

1. X. Yu, J. Zhang, J. Zhang, J. Niu, J. Zhao, Y. Wei and B. Yao, Photocatalytic degradation of ciprofloxacin using Zn-doped Cu<sub>2</sub>O particles: Analysis of degradation pathways and intermediates, *Chem. Eng. J.*, 2019, 374, 316-327.
2. F. Wang, X. Yu, M. Ge and S. Wu, One-step synthesis of TiO<sub>2</sub>/γ-Fe<sub>2</sub>O<sub>3</sub>/GO nanocomposites for visible light-driven degradation of ciprofloxacin, *Chem. Eng. J.*, 2020, 384, 123381.
3. N. Li, J. Zhang, Y. Tian, J. Zhao, J. Zhang and W. Zuo, Precisely controlled fabrication of magnetic 3D γ-Fe<sub>2</sub>O<sub>3</sub>@ZnO core-shell photocatalyst with enhanced activity: Ciprofloxacin degradation and mechanism insight, *Chem. Eng. J.*, 2017, 308, 377-385.
4. Q. Wang, Y. Cui, R. Huang, L. Zhong, P. Yan, S. Zhang, Q. Zhao, D. Jiang, A. Tang and H. Yang, A heterogeneous Fenton reaction system of N-doped TiO<sub>2</sub> anchored on sepiolite activates peroxymonosulfate under visible light irradiation, *Chem. Eng. J.*, 2020, 383, 123142.
5. Z. Jia, T. Li, Z. Zheng, J. Zhang, J. Liu, R. Li, Y. Wang, X. Zhang, Y. Wang and C. Fan, The BiOCl/diatomite composites for rapid photocatalytic degradation of ciprofloxacin: Efficiency, toxicity evaluation, mechanisms and pathways, *Chem. Eng. J.*, 2020, 380, 122422.
6. M. Chen, J. Yao, Y. Huang, H. Gong and W. Chu, Enhanced photocatalytic degradation of ciprofloxacin over Bi<sub>2</sub>O<sub>3</sub>/(BiO)<sub>2</sub>CO<sub>3</sub> heterojunctions: Efficiency, kinetics, pathways, mechanisms and toxicity evaluation, *Chem. Eng. J.*, 2018, 334, 453-461.
7. X. Hu, H. Zhao, Y. Liang and R. Chen, Energy level mediation of (BiO)<sub>2</sub>CO<sub>3</sub> via Br doping for efficient molecular oxygen activation and ciprofloxacin photodegradation, *Appl. Catal. B: Environ.*, 2019, 258, 117966.
8. K. Wang, Y. Li, G. Zhang, J. Li and X. Wu, 0D Bi nanodots/2D Bi<sub>3</sub>NbO<sub>7</sub> nanosheets heterojunctions for efficient visible light photocatalytic degradation of antibiotics: Enhanced molecular oxygen activation and mechanism insight, *Appl. Catal. B: Environ.*, 2019, 240, 39-49.
9. S. Shanavas, S. Mohana Roopan, A. Priyadharsan, D. Devipriya, S. Jayapandi, R. Acevedo and P. M. Anbarasan, Computationally guided synthesis of (2D/3D/2D) rGO/Fe<sub>2</sub>O<sub>3</sub>/g-C<sub>3</sub>N<sub>4</sub> nanostructure with improved charge separation and transportation efficiency for degradation of pharmaceutical molecules, *Appl. Catal. B: Environ.*, 2019, 255, 117758.
10. Y. Li, Y. Fu and M. Zhu, Green synthesis of 3D tripyramid TiO<sub>2</sub> architectures with assistance of aloe extracts for highly efficient photocatalytic degradation of antibiotic ciprofloxacin, *Appl. Catal. B: Environ.*, 2020, 260, 118149.
11. S. Li, T. Huang, P. Du, W. Liu and J. Hu, Photocatalytic transformation fate and toxicity of ciprofloxacin related to dissociation species: Experimental and theoretical evidences, *Water Res.*, 2020, 185, 116286.
12. J. Zhao, Z. Zhao, N. Li, J. Nan, R. Yu and J. Du, Visible-light-driven photocatalytic degradation of ciprofloxacin by a ternary Mn<sub>2</sub>O<sub>3</sub>/Mn<sub>3</sub>O<sub>4</sub>/MnO<sub>2</sub> valence state heterojunction, *Chem. Eng. J.*, 2018, 353, 805-813.
13. A. Kumar, G. Sharma, M. Naushad, T. Ahamad, R. C. Veses and F. J. Stadler, Highly visible active Ag<sub>2</sub>CrO<sub>4</sub>/Ag/BiFeO<sub>3</sub>@RGO nano-junction for photoreduction of CO<sub>2</sub> and photocatalytic removal of ciprofloxacin and bromate ions: The triggering effect of Ag and RGO, *Chem. Eng. J.*, 2019, 370, 148-165.
